# Supplementary material for: Galectins Differentially Regulate the Surface Glycosylation of Human Monocytes
Source: MDPI journal article supplement (doi:10.3390/biom12091168), 2022-08-23
Supplement: s1 [file s1]

**Supplementary Table S1.** Average fluorescence intensity of lectin binding to cell surface proteins isolated from human primary monocytes. Cells were treated with TNF $\alpha$  in the presence of human serum albumin (HSA) or recombinant human galectins (rhGal1, rhGal3, rhGal8). Significance was determined against results from cells treated with HSA. Statistically significant data are highlighted in bold.

|                                  |          |          |                                                                             | +TNF $\alpha$ |        |                  |        |             |        |                  |
|----------------------------------|----------|----------|-----------------------------------------------------------------------------|---------------|--------|------------------|--------|-------------|--------|------------------|
| Lectin                           | Symbol   | Position | Glycan specificity                                                          | HSA           | rhGal1 |                  | rhGal3 |             | rhGal8 |                  |
|                                  |          |          |                                                                             | Avg.          | Avg.   | p                | Avg.   | p           | Avg.   | p                |
| O-glycans                        |          |          |                                                                             |               |        |                  |        |             |        |                  |
| <i>Amaranthus caudatus</i>       | ACL      | 2CD      | Gal $\beta$ 3GalNAc                                                         | 1.5           | 0.0    | 0.2              | 0.0    | 0.2         | 1.1    | 0.6              |
| <i>Bauhinia purpurea</i>         | BPA      | 3AB      | Gal $\beta$ 3GalNAc                                                         | 1.0           | 0.0    | 0.4              | 0.0    | 0.4         | 0.7    | 0.8              |
| <i>Griffonia simplicifolia I</i> | GS-I     | 6GH      | $\alpha$ Gal, $\alpha$ 3GalNAc                                              | 0.0           | 0.0    | N/A              | 0.0    | N/A         | 0.0    | N/A              |
| Jacalin                          | Jacalin  | 7AB      | Gal $\beta$ 3GalNAc                                                         | 2.1           | 0.0    | <b>&lt;0.001</b> | 2.5    | <b>0.02</b> | 3.0    | <b>&lt;0.001</b> |
| <i>Maclura pomifera</i>          | MPA      | 8IJ      | Gal $\beta$ 3GalNAc                                                         | 2.2           | 0.0    | <b>&lt;0.001</b> | 0.6    | 0.1         | 2.6    | <b>0.04</b>      |
| Peanut                           | PNA      | 10CD     | Gal $\beta$ 3GalNAc                                                         | 3.0           | 0.0    | 0.2              | 0.8    | 0.6         | 3.0    | 0.5              |
| <i>Psophocarpus</i>              | PTL      | 10KL     | GalNAc, Gal                                                                 | 3.3           | 3.2    | 0.4              | 3.3    | 0.6         | 3.5    | 0.2              |
| <i>Sambucus nigra II</i>         | SNA-II   | 11KL     | GalNAc > Gal                                                                | 0.0           | 0.0    | N/A              | 0.0    | N/A         | 0.0    | N/A              |
| <i>Sophora japonica</i>          | SJA      | 11GH     | $\beta$ GalNAc                                                              | 3.0           | 2.7    | 0.9              | 2.4    | 0.2         | 3.2    | 0.2              |
| Soybean                          | SBA      | 11EF     | $\alpha$ > $\beta$ GalNAc                                                   | 0.6           | 0.0    | 0.4              | 0.9    | 0.4         | 0.0    | 0.4              |
| <i>Vicia villosa</i>             | VVA      | 12KL     | GalNAc                                                                      | 3.3           | 3.2    | 0.4              | 3.2    | 0.5         | 1.1    | 0.1              |
| <i>Wisteria floribunda</i>       | WFA      | 13AB     | GalNAc                                                                      | 2.8           | 2.3    | 0.5              | 2.5    | 0.3         | 3.3    | 0.1              |
| N-glycans                        |          |          |                                                                             |               |        |                  |        |             |        |                  |
| Concanavalin A                   | Con A    | 3IJ      | $\alpha$ Man, $\alpha$ Glc                                                  | 3.5           | 3.6    | 0.4              | 3.9    | 0.3         | 4.0    | 0.1              |
| <i>Dolichos biflorus</i>         | DBA      | 3KL      | $\alpha$ GalNAc                                                             | 0.0           | 0.0    | N/A              | 0.0    | N/A         | 0.6    | 0.4              |
| Human malectin                   | Malectin | 8EF      | Glc2-N-biose                                                                | 3.6           | 3.5    | 0.8              | 3.7    | 0.6         | 3.8    | 0.5              |
| Leucoagglutinin                  | PHA-L    | 9KL      | Gal $\beta$ 4GlcNAc $\beta$ 6(GlcNAc $\beta$ 2Man $\alpha$ 3)Man $\alpha$ 3 | 2.3           | 3.50   | 0.4              | 3.0    | 0.4         | 1.3    | 0.5              |
| <i>Phaseolus vulgaris</i>        | PHA-P    | 10AB     | Triantenary, tetraantenary structures                                       | 2.4           | 3.3    | 0.5              | 3.2    | 0.5         | 2.4    | 0.9              |

|                                                |         |      |                                                                                                                  |     |      |     |     |     |     |              |
|------------------------------------------------|---------|------|------------------------------------------------------------------------------------------------------------------|-----|------|-----|-----|-----|-----|--------------|
| <i>Phaseolus vulgaris</i><br>Erythroagglutinin | PHA-E   | 9IJ  | Gal $\beta$ 4GlcNAc $\beta$ 2Man $\alpha$ 6(<br>GlcNAc $\beta$ 4)(GlcNAc $\beta$ 4Ma<br>$\alpha$ 3)Man $\beta$ 4 | 2.5 | 3.5  | 0.5 | 3.9 | 0.3 | 1.4 | 0.5          |
| <i>Poly-N-acetyllactosamine</i>                |         |      |                                                                                                                  |     |      |     |     |     |     |              |
| <i>Clitocybe nebularis</i>                     | CNL     | 3GH  | $\alpha$ / $\beta$ GalNAc,<br>GalNAc $\beta$ 4GlcNAc                                                             | 2.1 | 0.6  | 0.1 | 0.6 | 0.1 | 0.6 | <b>0.007</b> |
| <i>Erythrina crista-galli</i>                  | ECA     | 4GH  | Gal $\beta$ 4GlcNAc                                                                                              | 0.9 | 0.0  | 0.4 | 0.8 | 0.4 | 0.0 | 0.4          |
| Human galectin1                                | GAL1    | 5AB  | Branched LacNAc, Gal                                                                                             | 2.6 | 1.9  | 0.5 | 3.1 | 0.2 | 3.0 | 0.4          |
| Human galectin1-S                              | GAL1-S  | 5CD  | Branched LacNAc                                                                                                  | 2.6 | 2.8  | 0.3 | 2.7 | 0.7 | 3.0 | 0.4          |
| Human galectin2                                | GAL2    | 5EF  | Branched LacNAc                                                                                                  | 0.0 | 0.0  | N/A | 0.0 | N/A | 0.0 | N/A          |
| Human galectin3                                | GAL3    | 5GH  | poly LacNAc                                                                                                      | 3.6 | 3.5  | 0.2 | 3.6 | 0.9 | 4.2 | <b>0.04</b>  |
| Human galectin3C-S                             | GAL3C-S | 5IJ  | poly LacNAc                                                                                                      | 3.1 | 3.0  | 0.4 | 3.2 | 0.9 | 3.4 | 0.6          |
| Human galectin7-S                              | GAL7-S  | 5KL  | Gal $\beta$ 1-3GlcNAc                                                                                            | 2.8 | 3.0  | 0.7 | 3.1 | 0.6 | 3.3 | 0.3          |
| Human galectin9                                | GAL9    | 6AB  | poly LacNAc                                                                                                      | 3.6 | 3.7  | 0.7 | 3.7 | 0.8 | 3.8 | 0.7          |
| <i>Laetiporus sulphureus</i>                   | LSL-N   | 8AB  | LacNAc                                                                                                           | 3.6 | 3.7  | 0.3 | 3.7 | 0.7 | 3.7 | 0.7          |
| <i>Fucose</i>                                  |         |      |                                                                                                                  |     |      |     |     |     |     |              |
| <i>Anguilla anguilla</i>                       | AAA     | 1IJ  | $\alpha$ Fuc                                                                                                     | 0.0 | 0.0  | N/A | 0.0 | N/A | 0.0 | 0.0          |
| <i>Aleuria aurantia</i>                        | AAL     | 1KL  | Fuc $\alpha$ 6GlcNAc                                                                                             | 3.3 | 3.2  | 0.5 | 3.6 | 0.2 | 3.1 | 0.4          |
| <i>Burkholderia cenocepacia</i>                | BC2LCN  | 2KL  | Fuc $\alpha$ 1-2Gal $\beta$ 1-3GalNAc/<br>GlcNAc                                                                 | 2.7 | 2.9  | 0.4 | 3.0 | 0.6 | 3.1 | 0.05         |
| <i>Lotus tetragonolobus</i>                    | Lotus   | 7KL  | $\alpha$ Fuc                                                                                                     | 1.9 | 1.6  | 0.8 | 2.8 | 0.4 | 2.8 | 0.4          |
| <i>Pseudomonas aeruginosa</i>                  | PA-IIL  | 9CD  | Fucose, Mannose                                                                                                  | 0.0 | 0.0  | N/A | 0.0 | N/A | 0.0 | N/A          |
| <i>Ralstonia solanacearum</i>                  | RS-FUC  | 11AB | Fucose                                                                                                           | 3.1 | 3.3  | 0.6 | 3.3 | 0.1 | 3.3 | 0.5          |
| <i>Ulex europaeus I</i>                        | UEA I   | 12EF | $\alpha$ Fuc                                                                                                     | 2.0 | 1.07 | 0.7 | 1.8 | 0.8 | 0.6 | 0.2          |
| <i>Sialic acid</i>                             |         |      |                                                                                                                  |     |      |     |     |     |     |              |
| <i>Agrocybe cylindracea</i>                    | ACG     | 2AB  | $\alpha$ 2-3 Sialic Acid                                                                                         | 3.3 | 3.4  | 0.9 | 3.6 | 0.6 | 3.8 | 0.5          |
| <i>Maackia amurensis I</i>                     | MAA     | 8CD  | Neu5Ac $\alpha$ 2-3Gal( $\beta$ 1–<br>4)GlcNAc/Glc                                                               | 3.0 | 2.7  | 0.3 | 2.8 | 0.6 | 3.3 | 0.7          |
| <i>Polyporus squamosus</i>                     | PSL1A   | 10IJ | $\alpha$ 2-6 Sialic Acid                                                                                         | 4.2 | 4.1  | 0.6 | 4.3 | 0.7 | 4.3 | 0.8          |
| <i>Sambucus nigra I</i>                        | SNA-I   | 11IJ | Neu5Ac $\alpha$ 2-6Gal, GalNAc                                                                                   | 2.9 | 3.0  | 0.8 | 3.1 | 0.6 | 3.1 | 0.7          |

|                                  |         |      |                               |     |     |     |     |     |      |             |
|----------------------------------|---------|------|-------------------------------|-----|-----|-----|-----|-----|------|-------------|
| <i>Sambucus sieboldiana</i>      | SAMB    | 11CD | NeuAc $\alpha$ 2-6Gal, GalNAc | 3.9 | 3.9 | 0.7 | 4.0 | 0.6 | 4.0  | 0.7         |
| Wheat germ                       | WGA     | 13CD | GlcNAc, Sialic acid           | 2.8 | 2.8 | 0.7 | 2.5 | 0.6 | 3.3  | 0.1         |
| <b>Mannose</b>                   |         |      |                               |     |     |     |     |     |      |             |
| <i>Allium sativum</i>            | ASA     | 2EF  | $\alpha$ Man                  | 3.2 | 3.4 | 0.4 | 3.4 | 0.5 | 3.5  | 0.2         |
| <i>Burkholderia cenocepacia</i>  | BC2L-A  | 2IJ  | High mannose                  | 2.7 | 2.9 | 0.4 | 2.8 | 0.8 | 3.3  | 0.3         |
| <i>Calystegia sepium</i>         | CALSEPA | 3CD  | High mannose                  | 3.3 | 3.5 | 0.2 | 3.4 | 0.9 | 3.8  | 0.4         |
| <i>Galanthus nivalis</i>         | GNA     | 6CD  | $\alpha$ Man                  | 3.5 | 3.7 | 0.2 | 3.7 | 0.5 | 3.9  | 0.3         |
| <i>Griffithia sp.</i>            | GRFT    | 6EF  | High mannose                  | 3.3 | 3.5 | 0.3 | 3.6 | 0.4 | 3.8  | 0.2         |
| <i>Hippeastrum hybrid</i>        | HHA     | 6KL  | $\alpha$ Man                  | 3.3 | 3.6 | 0.1 | 3.6 | 0.5 | 3.7  | 0.2         |
| <i>Narcissus pseudonarcissus</i> | NPA     | 8KL  | $\alpha$ Man                  | 3.4 | 3.5 | 0.7 | 3.6 | 0.6 | 3.7  | 0.3         |
| <i>Oryza sativa</i>              | ORYSATA | 9AB  | High mannose                  | 1.7 | 0.9 | 0.5 | 2.1 | 0.8 | 2.2  | 0.4         |
| <i>Phlebodium aureum</i>         | PALa    | 9GH  | High mannose                  | 1.5 | 0.9 | 0.4 | 1.6 | 0.9 | 0.0  | <b>0.02</b> |
| <i>Vicia faba</i>                | VFA     | 12IJ | $\alpha$ Man                  | 0.9 | 0.0 | 0.1 | 0.3 | 0.4 | 0.0  | 0.1         |
| <b>Mannose/Glucose</b>           |         |      |                               |     |     |     |     |     |      |             |
| <i>Lens Culinaris</i>            | LcH A   | 7EF  | Man, $\alpha$ Glc             | 3.4 | 3.5 | 0.5 | 3.7 | 0.3 | 3.8  | 0.3         |
| Lentil                           | LENTIL  | 7IJ  | D-Mannose, D-glucose          | 3.4 | 3.4 | 0.5 | 3.6 | 0.5 | 3.6  | 0.5         |
| <i>Musa acuminata</i>            | BANLEC  | 2GH  | Mannose, Glucose              | 3.7 | 3.9 | 0.5 | 3.9 | 0.4 | 4.1  | 0.1         |
| <i>Pisum sativum</i>             | Pea     | 10GH | $\alpha$ Man, $\alpha$ Glc    | 3.5 | 3.5 | 0.7 | 3.7 | 0.4 | 3.7  | 0.5         |
| <b>N-acetylglucosamine</b>       |         |      |                               |     |     |     |     |     |      |             |
| <i>Datura stramonium</i>         | DSA     | 4EF  | GlcNAc                        | 3.2 | 3.5 | 0.4 | 3.4 | 0.3 | 3.3  | 0.8         |
| <i>E. coli</i>                   | F17AG   | 4KL  | GlcNAc                        | 3.2 | 3.4 | 0.5 | 3.5 | 0.6 | 3.7  | 0.3         |
| <i>Griffonia (Brandeiraea)</i>   | GS-II   | 6IJ  | $\alpha/\beta$ GlcNAc         | 0.0 | 0.0 | N/A | 0.0 | N/A | 0.0  | N/A         |
| <i>Lycopersicon esculentum</i>   | LEA     | 7GH  | GlcNAc                        | 1.0 | 0.0 | 0.4 | 0.0 | 0.4 | 1.0  | 0.9         |
| <i>Solanum tuberosum</i>         | STL     | 12AB | GlcNAc                        | 4.0 | 4.0 | 0.5 | 4.1 | 0.9 | 4.3  | 0.5         |
| <i>Ulex europaeus II</i>         | UEA-II  | 12GH | Poly $\beta$ (1,4)GlcNAc      | 0.7 | 0.0 | 0.4 | 0.0 | 0.4 | 0.0  | 0.4         |
| <i>Urtica dioica</i>             | UDA     | 12CD | GlcNAc                        | 3.4 | 3.4 | 0.7 | 3.4 | 0.9 | 3.61 | 0.5         |
| <b>Galactose</b>                 |         |      |                               |     |     |     |     |     |      |             |
| <i>Coprinopsis cinerea</i>       | CGL2    | 3EF  | $\beta$ Gal                   | 3.8 | 3.9 | 0.8 | 4.0 | 0.6 | 4.5  | <b>0.03</b> |

|                                    |              |      |                                                               |     |     |             |     |     |     |     |
|------------------------------------|--------------|------|---------------------------------------------------------------|-----|-----|-------------|-----|-----|-----|-----|
| <i>Dictyostelium discoideum I</i>  | Discoidin I  | 4AB  | $\alpha$ GalNAc                                               | 1.0 | 0.0 | 0.4         | 1.4 | 0.6 | 1.2 | 0.8 |
| <i>Dictyostelium discoideum II</i> | Discoidin II | 4CD  | Gal, LacNAc                                                   | 3.0 | 0.0 | <b>0.01</b> | 2.1 | 0.2 | 3.5 | 0.3 |
| <i>Eunonymus europaeus</i>         | EEL          | 4IJ  | Gal $\alpha$ 3Gal                                             | 1.8 | 2.0 | 0.9         | 2.2 | 0.8 | 1.9 | 0.5 |
| <i>Marasmius oreades</i>           | MOA          | 8GH  | Gal $\alpha$ 1-3Gal $\beta$ 1-4GlcNAc,<br>Gal $\alpha$ 1-3Gal | 2.9 | 1.8 | 0.3         | 2.3 | 0.6 | 2.2 | 0.6 |
| <i>Phaseolus lunatus</i>           | LBA          | 7CD  | GalNAc $\alpha$ (1,3)[ $\alpha$ Fuc(1,2)]<br>Gal              | 0.2 | 0.0 | 0.4         | 0.0 | 0.4 | 0.0 | 0.4 |
| <i>Pleurocybella porrigens</i>     | PPL          | 10EF | $\alpha$ / $\beta$ GalNAc                                     | 0.0 | 0.0 | N/A         | 0.0 | N/A | 0.0 | N/A |
| <i>Pseudomonas aeruginosa</i>      | PA-IL        | 9EF  | Gal $\alpha$ 1-3(4)Gal                                        | 0.0 | 0.0 | N/A         | 0.7 | 0.4 | 0.0 | N/A |

---

N/A, not applicable.
